# Supplementary material
Source: PubMed Central journal article supplement (PMC2670992)
Supplement: NIHMS92687-supplement-01.pdf [file NIHMS92687-supplement-01.pdf]

**Supplementary Table 1.** Plasmids used.

|                                     | <b>Relevant characteristics</b>                                                                                                                                      | <b>Reference or source</b>                  |
|-------------------------------------|----------------------------------------------------------------------------------------------------------------------------------------------------------------------|---------------------------------------------|
| <b>Plasmid</b>                      |                                                                                                                                                                      |                                             |
| pGFP                                | Vector for GFP gene expression                                                                                                                                       | [NOVAGEN]                                   |
| pCGLS1                              | Vector containing the <i>lux</i> operon from <i>Xenorhabdus luminescens</i> for bacterial bioluminescence and <i>in-vivo</i> imaging ( GenBank accession no. M90092) | [7]                                         |
| pET28a <sup>+</sup> :: <i>chrR</i>  | <i>E. coli</i> ChrR (GenBank accession no. DQ989184)                                                                                                                 | [7]                                         |
| pET28a <sup>+</sup> :: <i>chrR6</i> | <i>E. coli</i> mutant (ChrR6) enzyme of ChrR (GenBank accession no. DQ987901)                                                                                        | [7]                                         |
| pKT2/UXbGSN                         | Transposon vector with neomycin/G418-resistance marker for stable gene expression in mammalian cells driven by the human ubiquitin C promoter                        | [16; Bachman, M and Contag, C; unpublished] |
| pKT2/CXSZ                           | Transposon vector with zeocin resistance gene for stable gene expression in mammalian cells driven by the CMV-IE promoter                                            | [16; Bachman, M and Contag, C; unpublished] |
| pUbc-SB11                           | Vector for transient expression of a modified <i>Sleeping Beauty</i> transposase                                                                                     | [16]                                        |

**Supplementary Table 2.** Kinetics of CNOB reduction of the wild type ChrR and the improved ChrR6 enzymes.

| <b>Enzyme</b> | <b>V<sub>max</sub> (nmol CNOB mg protein<sup>-1</sup> min<sup>-1</sup>)</b> | <b>K<sub>m</sub> (μM)</b> | <b>K<sub>cat</sub> (S<sup>-1</sup>)</b> | <b>K<sub>cat</sub>/K<sub>m</sub> (M<sup>-1</sup>S<sup>-1</sup>)</b> |
|---------------|-----------------------------------------------------------------------------|---------------------------|-----------------------------------------|---------------------------------------------------------------------|
| <b>ChrR</b>   | 14 ± 5                                                                      | 0.203 ± 0.03              | 0.477 ± 0.15                            | 2.3X10 <sup>6</sup> ± 6 X10 <sup>5</sup>                            |
| <b>ChrR6</b>  | 263 ± 3                                                                     | 0.136 ± 0.02              | 8.8 ± 0.7                               | 6.4X10 <sup>7</sup> ± 5 X10 <sup>5</sup>                            |

**Supplementary Table 3.** CNOB administration was done intravenously to healthy female Balb/C mice age 8-10 weeks. Blood samples were collected by retino orbital bleeding 7 days following CNOB injection.

| Test                            | 3.3 mg/kg<br>CNOB | H/L | 9.9 mg/kg<br>CNOB | H/L | 20 mg/kg<br>CNOB | H/L | Reference<br>range | Units |
|---------------------------------|-------------------|-----|-------------------|-----|------------------|-----|--------------------|-------|
| <b>Glucose</b>                  | 245.5 ± 6.7       |     | 238 ± 1.4         | L   | 284.5 ± 44.5     |     | 255 – 320          | mg/dL |
| <b>AST</b>                      | 120.5 ± 13.1      |     | 117.5 ± 3.6       | L   | 106.5 ± 10.6     | L   | 130 – 200          | IU/L  |
| <b>ALT</b>                      | 66 ± 1.4          |     | 72 ± 12.7         |     | 97 ± 29.7        |     | 45 – 100           | IU/L  |
| <b>Alkaline phosphatase</b>     | 148 ± 0.7         |     | 155 ± 2.8         |     | 144 ± 11.3       |     | 150 – 160          | IU/L  |
| <b>GGT</b>                      | 10.5 ± 2.5        | H   | 7 ± 1.4           | H   | 10 ± 0           | H   | 1-2                | IU/L  |
| <b>Total Bilirubin</b>          | 0                 |     | 0                 |     | 0.1 ± 0.1        |     | 0-0.4              | mg/dL |
| <b>Cholesterol</b>              | 102.5 ± 0.4       |     | 107 ± 0.1         |     | 113.5 ± 2.1      |     | 95-135             | mg/dL |
| <b>BUN</b>                      | 30                | H   | 33.5 ± 3.5        | H   | 28.5 ± 3.5       |     | 17-24              | mg/dL |
| <b>Creatinine*</b>              |                   |     |                   |     |                  |     | 0.15 – 0.45        | mg/dL |
| <b>Calcium</b>                  | 7.85 ± 2.1        |     | 11.8 ± 0.3        |     | 12.2 ± 0.1       | H   | 8.9 – 10.7         | mg/dL |
| <b>Phosphorus</b>               | 5.65 ± 0.1        | L   | 7.05 ± 1.3        |     | 6.3 ± 1.0        | L   | 8-11               | mg/dL |
| <b>Calcium/Phosphorus ratio</b> | 1.4 ± 0.4         |     | 1.75 ± 0.4        |     | 2 ± 0.4          | H   | 0.9-1.7            |       |
| <b>T. protein</b>               | 5.4 ± 0.1         |     | 5.4 ± 0.5         |     | 5.4 ± 0.2        |     | 5.0 – 6.2          | mg/dL |
| <b>Albumin</b>                  | 1.8 ± 0.1         |     | 1.8 ± 0.4         |     | 2.4 ± 0.2        | H   | 1.3-1.7            | mg/dL |
| <b>Globulin</b>                 | 3.6 ± 0.2         |     | 3.6 ± 0.9         |     | 3.0 ± 0.0        | L   | 3.7-4.2            |       |
| <b>A/G ratio</b>                | 0.55 ± 0.3        |     | 0.6 ± 0.2         |     | 0.8 ± 0.1        | H   | 0.3-0.5            |       |
| <b>CPK</b>                      | 908.5 ± 360.3     | H   | 728 ± 314         | H   | 433 ± 100.4      | H   | 50 - 300           | IU/L  |

\* Creatine = less than 0.6 mg/dL

Abbreviations: AST, aspartate aminotransferase; ALT, alanine aminotransferase; GGT,  $\gamma$ -glutamyl aminotransferase; BUN, blood urea nitrogen; A/G ratio, albumin/globulin ratio; CPK, creatine phosphokinase.
