# Supplementary material
Source: PubMed Central journal article supplement (PMC2670992)
Supplement: NIHMS92687-supplement-Fig__1-5.pdf [file NIHMS92687-supplement-Fig__1-5.pdf]

**Supplementary Figures**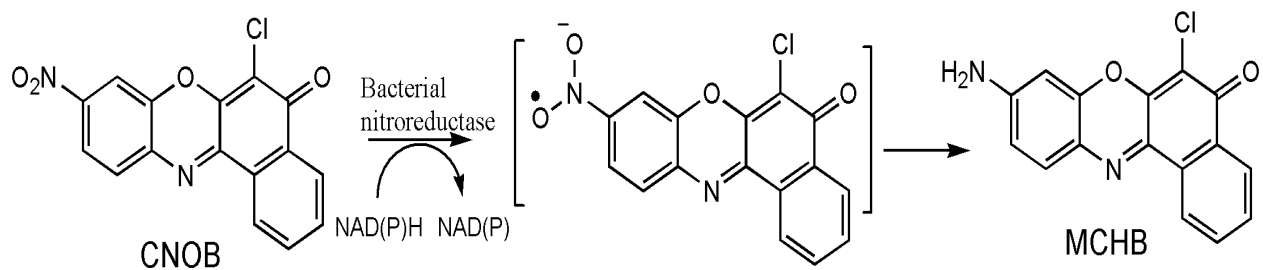

**Supplementary Figure 1.** *6-chloro-9-nitro-5-oxo-5H-benzo[a]phenoxazine* (CNOB), its nitro-radical form, and reduced product, *9-amino-6-chloro-5H-benzo[a]phenoxazine-5-one* (MCHB).

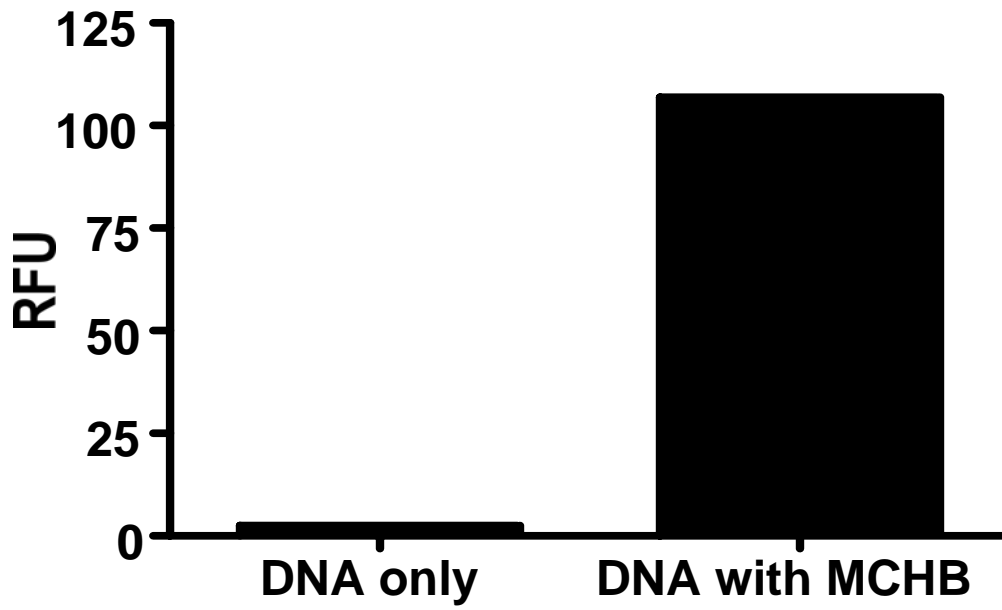

**Supplementary Fig 2.** MCHB binds to DNA. 1 $\mu$ g of pUC19 plasmid DNA was mixed with 1 $\mu$ M MCHB, or Tris buffer (control) for 10 minutes. MCHB fluorescence was read in a plate reader.

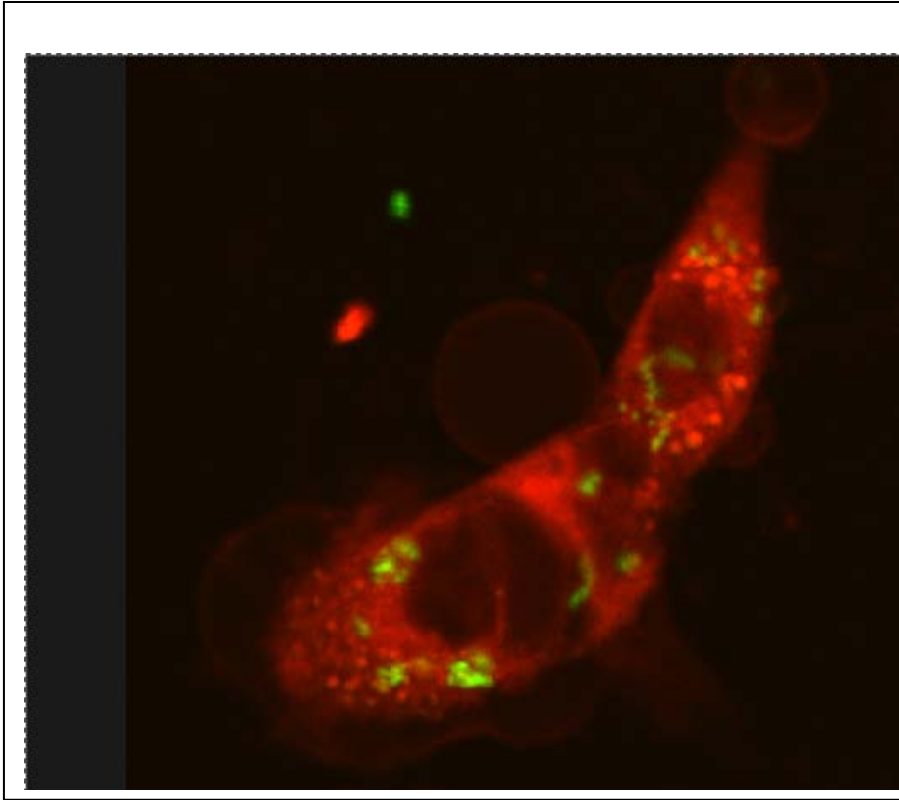

**Supplementary Fig 3.** Attached JC cells were infected with SL7838-*chrR6* bacteria expressing GFP (MOI of 10 CFU/cell) for 30 minutes before extracellular bacteria were washed off and gentamycin added to the medium at  $20 \mu\text{g ml}^{-1}$ . CNOB ( $15 \mu\text{M}$ ) was added and fluorescence was read by confocal microscopy after 30 minutes ( $60\times$  magnification). Note focal distribution of MCHB fluorescence in the cytoplasm.

**Supplementary Fig 4.** Video showing rotation of the reconstructed cell spheroid of Fig. 3d.

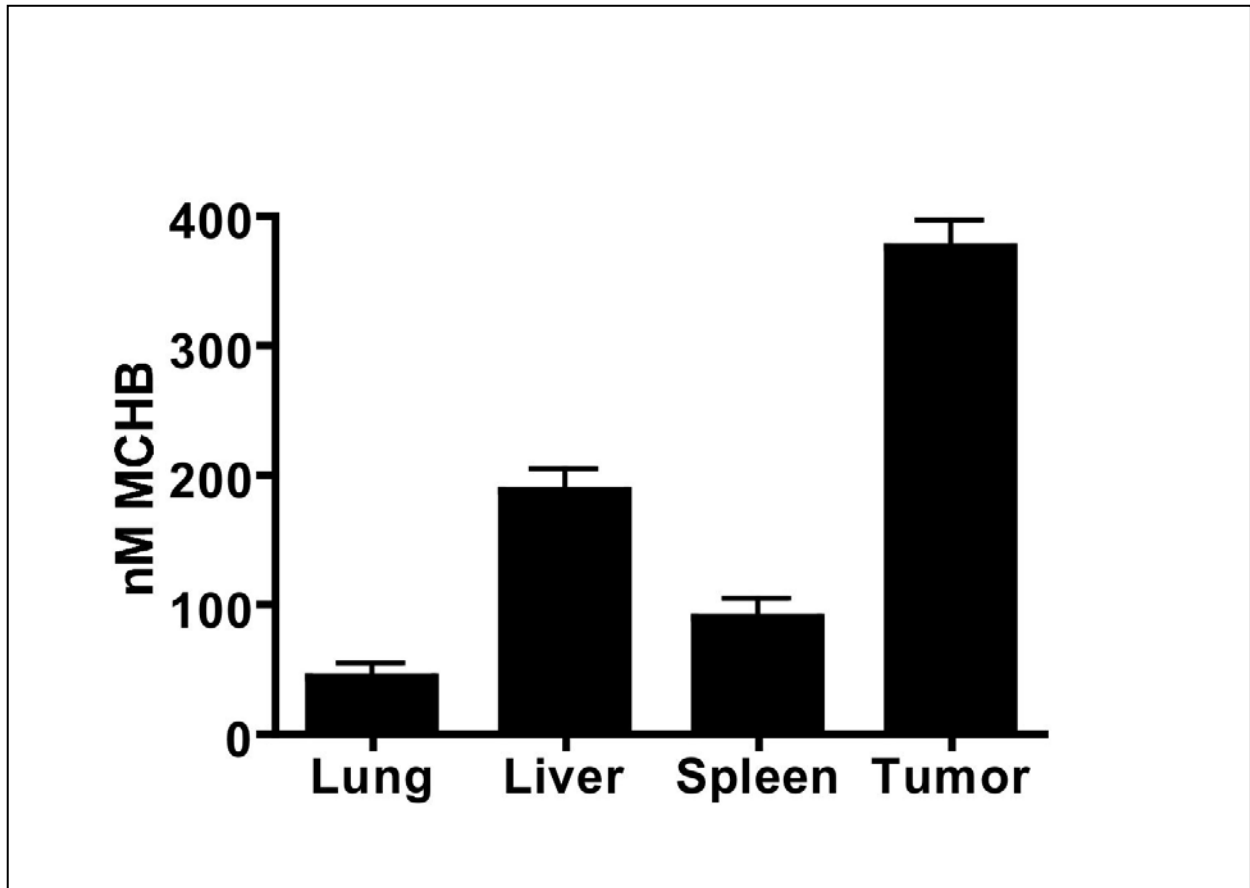

**Supplementary Fig 5.** Determination of MCHB biodistribution following intravenously delivery of SL7838-*chrR6* and CNOB in mice implanted with untransfected 4T1 tumors (not generating endogenous ChrR6). Animals were sacrificed 8 hours after CNOB injection, and tissues harvested. 1 mg of each tissue was ground in 100  $\mu$ l of PBS, centrifuged at 500 rpm for 5 minutes and the supernatant fluorescence (Ex 575nm Em 625 nm) was determined. MCHB concentrations were determined from a standard curve.
